# Supplementary material for: Perinatal Protein Malnutrition Affects Mitochondrial Function in Adult and Results in a Resistance to High Fat Diet-Induced Obesity
Source: PubMed Central journal article supplement (PMC4132016; doi:10.1371/journal.pone.0104896), 2014-08-13
Supplement: pone.0104896.s003.pdf [file pone.0104896.s003.pdf]

**TABLE S1:** Sequences of mouse qPCR primers

|                |                |                                 |
|----------------|----------------|---------------------------------|
| COX1           | Forward Primer | 5'-TCGGAGCCCCAGATATAGCA -3'     |
|                | Reverse Primer | 5'-TTTCCGGCTAGAGGTGGGTA -3'     |
| COX3           | Forward Primer | 5'-CAAGGCCACCACACTCCTAT -3'     |
|                | Reverse Primer | 5'-ATTCCTGTTGGAGGTCAGCA -3'     |
| COX4-1         | Forward Primer | 5'-AGTGTTGTGAAGAGTGAAGAC -3'    |
|                | Reverse Primer | 5'-GCGGTACAACCTGAACTTTCTC -3'   |
| COX4-2         | Forward Primer | 5'-CTGCCCGGAGTCTGGTAATG -3'     |
|                | Reverse Primer | 5'-CAGTCAACGTAGGGGGTCATC -3'    |
| NDUFB6         | Forward Primer | 5'-TCGCTGTTTCTCATGTGCTT -3'     |
|                | Reverse Primer | 5'-TCTCCAGTCTCCAGAATTGTATCA -3' |
| NDUFB8         | Forward Primer | 5'-GGCCGCCAAGAAGTATAACA -3'     |
|                | Reverse Primer | 5'-TGATACCACGGATCCCTCTC -3'     |
| NRF1           | Forward Primer | 5'-CAGCACCTTTGGAGAATGTG -3'     |
|                | Reverse Primer | 5'-CCTGGGTCATTTTGTCCACA -3'     |
| NRF2           | Forward Primer | 5'-GATCCGCCAGCTACTCCCAGGTTG -3' |
|                | Reverse Primer | 5'-CAGGGCAAGCGACTCATGGTCATC -3' |
| PGC1- $\alpha$ | Forward Primer | 5'-AGCCGTGACCACTGACAACGAG -3'   |
|                | Reverse Primer | 5'-GCTGCATGGTTCTGAGTGCTAAG -3'  |
| PGC1- $\beta$  | Forward Primer | 5'-TGGAAAGCCCCTGTGAGAGT -3'     |
|                | Reverse Primer | 5'-TTGTATGGAGGTGTGGTGGG -3'     |
| TFAM           | Forward Primer | 5'-CAAGTCAGCTGATGGGTATGG -3'    |
|                | Reverse Primer | 5'-TTTCCCTGAGCCGAATCATCC -3'    |
| UCP1           | Forward Primer | 5'-GGCATTTCAGAGGCAAATCAGCT -3'  |
|                | Reverse Primer | 5'-CAATGAACACTGCCACACCTC -3'    |
| UCP2           | Forward Primer | 5'-TCTACAATGGGCTGGTCGC -3'      |
|                | Reverse Primer | 5'-CAAGCGGAGAAAGGAAGGC -3'      |
| UCP3           | Forward Primer | 5'-CCTACAGAACCATCGCCAGG -3'     |
|                | Reverse Primer | 5'-ACCGGGGAGGCCACCACTGT -3'     |

|         |                |                               |
|---------|----------------|-------------------------------|
| HPRT1   | Forward Primer | 5'-TCCTCCTCAGACCGCTTTT-3'     |
|         | Reverse Primer | 5'-CCTGGTTCATCATCGCTAATC-3'   |
| NONO    | Forward Primer | 5'-TGCTCCTGTGCCACCTGGTACTC-3' |
|         | Reverse Primer | 5'-CCGGAGCTGGACGGTTGAATGC-3'  |
| MHC-I   | Forward Primer | 5'-CTCCCAAGGAGAGACGACTG-3'    |
|         | Reverse Primer | 5'-TTAAGCAGGTCGGCTGAGTT-3'    |
| MHC-IIa | Forward Primer | 5'-AAAGCTCCAAGGACCCTCTT-3'    |
|         | Reverse Primer | 5'-AGTCATGACTGCTGAACTCAC-3'   |
| MHC-IIb | Forward Primer | 5'-TGGCCGAGCAAGAGCTAC-3'      |
|         | Reverse Primer | 5'-TTGATGAGGCTGGTGTCTG-3'     |
| MHC-IIx | Forward Primer | 5'-AATCAAAGGTCAAGGCCTACAA-3'  |
|         | Reverse Primer | 5'-GAATTTGGCCAGGTTGACAT-3'    |
